# Supplementary material
Source: PubMed Central journal article supplement (PMC3839910)
Supplement: NIHMS3420-supplement-Supplementary_Data.pdf [file NIHMS3420-supplement-Supplementary_Data.pdf]

**Supplementary Table 1.** HLA-A variants in patients carrying rs1061235T but not HLA-A\*31:01.

|               | Total<br>N | rs1061235T without A*31:01 |                      |                              | HLA-A*33:01   |                       |                              | HLA-A*33:03   |                      |                              |
|---------------|------------|----------------------------|----------------------|------------------------------|---------------|-----------------------|------------------------------|---------------|----------------------|------------------------------|
|               |            | N<br>positive              | OR<br>(95% CI)       | <i>P</i> -value <sup>a</sup> | N<br>positive | OR<br>(95% CI)        | <i>P</i> -value <sup>a</sup> | N<br>positive | OR<br>(95% CI)       | <i>P</i> -value <sup>a</sup> |
| CBZ-HSS       | 3          | 1                          |                      |                              |               |                       |                              | 1             |                      |                              |
| CBZ-MPE       | 20         | 3                          |                      |                              | 1             |                       |                              | 2             |                      |                              |
| CBZ-SJS/TEN   | 9          | -                          |                      |                              | -             |                       |                              | -             |                      |                              |
| CBZ-AGEP      | 1          | 1                          |                      |                              | 1             |                       |                              | -             |                      |                              |
| All CBZ cases | 33         | 5                          | 4.98<br>(0.90-34.08) | <b>0.034</b>                 | 2             | 4.39<br>(0.22-264.95) | 0.238                        | 3             | 3.35<br>(0.37-41.55) | 0.326                        |
| HSS/MPE       | 23         | 4                          | 5.83<br>(0.91-43.18) | <b>0.033</b>                 | 1             | 2.84<br>(0.35-227.41) | 0.457                        | 3             | 4.48<br>(0.49-56.09) | 0.112                        |
| CBZ-tolerant  | 88         | 3                          |                      |                              | 1             |                       |                              | 2             |                      |                              |

AGEP, Acute Generalized Exanthematous Pustulosis; CBZ, carbamazepine; CI, confidence interval; HSS, drug-induced hypersensitivity syndrome; MPE, maculopapular exanthem; SJS/TEN, Stevens-Johnson syndrome/toxic epidermal necrolysis; OR, odds ratio

<sup>a</sup>Calculated using Fisher's exact test

Significant *P*-values are indicated in bold.
